# Supplementary material for: A hypomorphic Mpi mutation unlocks an in vivo tool for studying global N-glycosylation deficiency
Source: JCI journal article supplement (doi:10.1172/jci.insight.180752), 2025-07-21
Supplement: sd1 [file 1]

## Supplementary Material for: A hypomorphic *Mpi* mutation unlocks an in vivo tool for studying global *N*-glycosylation deficiency

Authors: Elisa B. Lin<sup>1</sup>, Steve Meregini<sup>1</sup>, Zhao Zhang<sup>2, 3</sup>, Avishek Roy<sup>1</sup>, Tandav Argula<sup>1</sup>, James Mitchell<sup>1</sup>, William J. Israelsen<sup>4</sup>, Sara Ludwig<sup>3</sup>, Jamie Russell<sup>3</sup>, Jiexia Quan<sup>3</sup>, Sara Hildebrand<sup>3</sup>, Evan Nair-Gill<sup>2</sup>, Bruce Beutler<sup>3</sup>, Jeffrey A. SoRelle<sup>1,3,5\*</sup>

### Affiliations:

1. Department of Pathology, University of Texas Southwestern Medical Center, Dallas, TX, USA
2. Division of Endocrinology, Department of Internal Medicine, University of Texas Southwestern Medical Center, Dallas, TX, USA
3. Center for Genetics of Host Defense, University of Texas Southwestern Medical Center, Dallas, TX, USA
4. Department of Biochemistry, University of Texas Southwestern Medical Center, Dallas, TX, USA
5. Division of Allergy/Immunology, Department of Pediatrics, University of Texas Southwestern Medical Center, Dallas, TX, USA

### \*Corresponding Author

Jeffrey A. SoRelle, M.D.

Department of Pathology

University of Texas Southwestern Medical Center

5323 Harry Hines Boulevard

Dallas, TX 75390

Office: +1 214-648-4111

Email: Jeffrey.SoRelle@utsouthwestern.edu

Figure S1

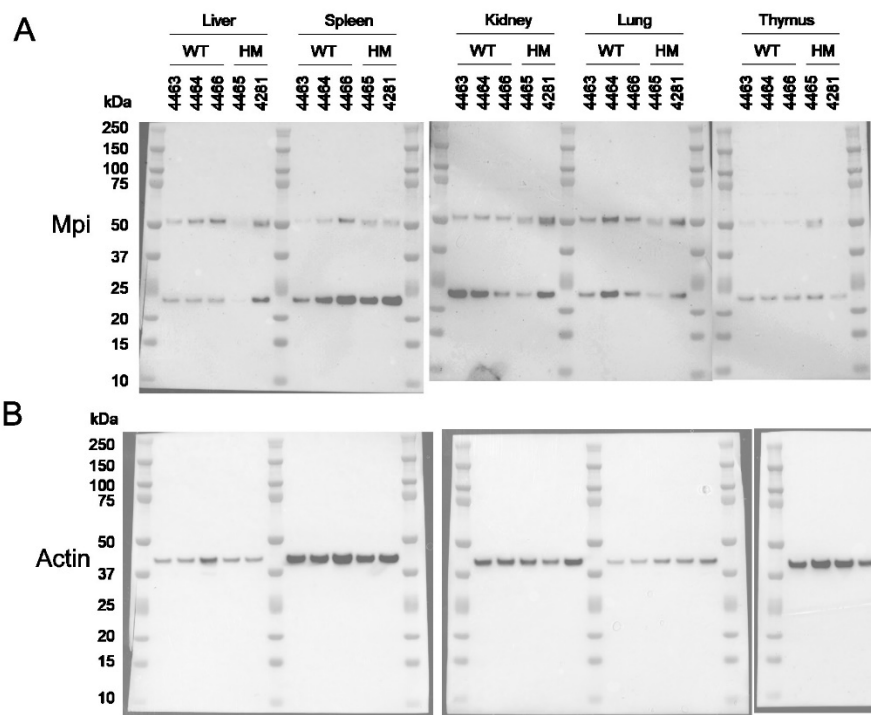

Supplemental Figure 1. **Extended Mpi protein expression.** Western blot of liver, spleen, lung and thymus for A) Mpi and B) Actin.

Figure S2

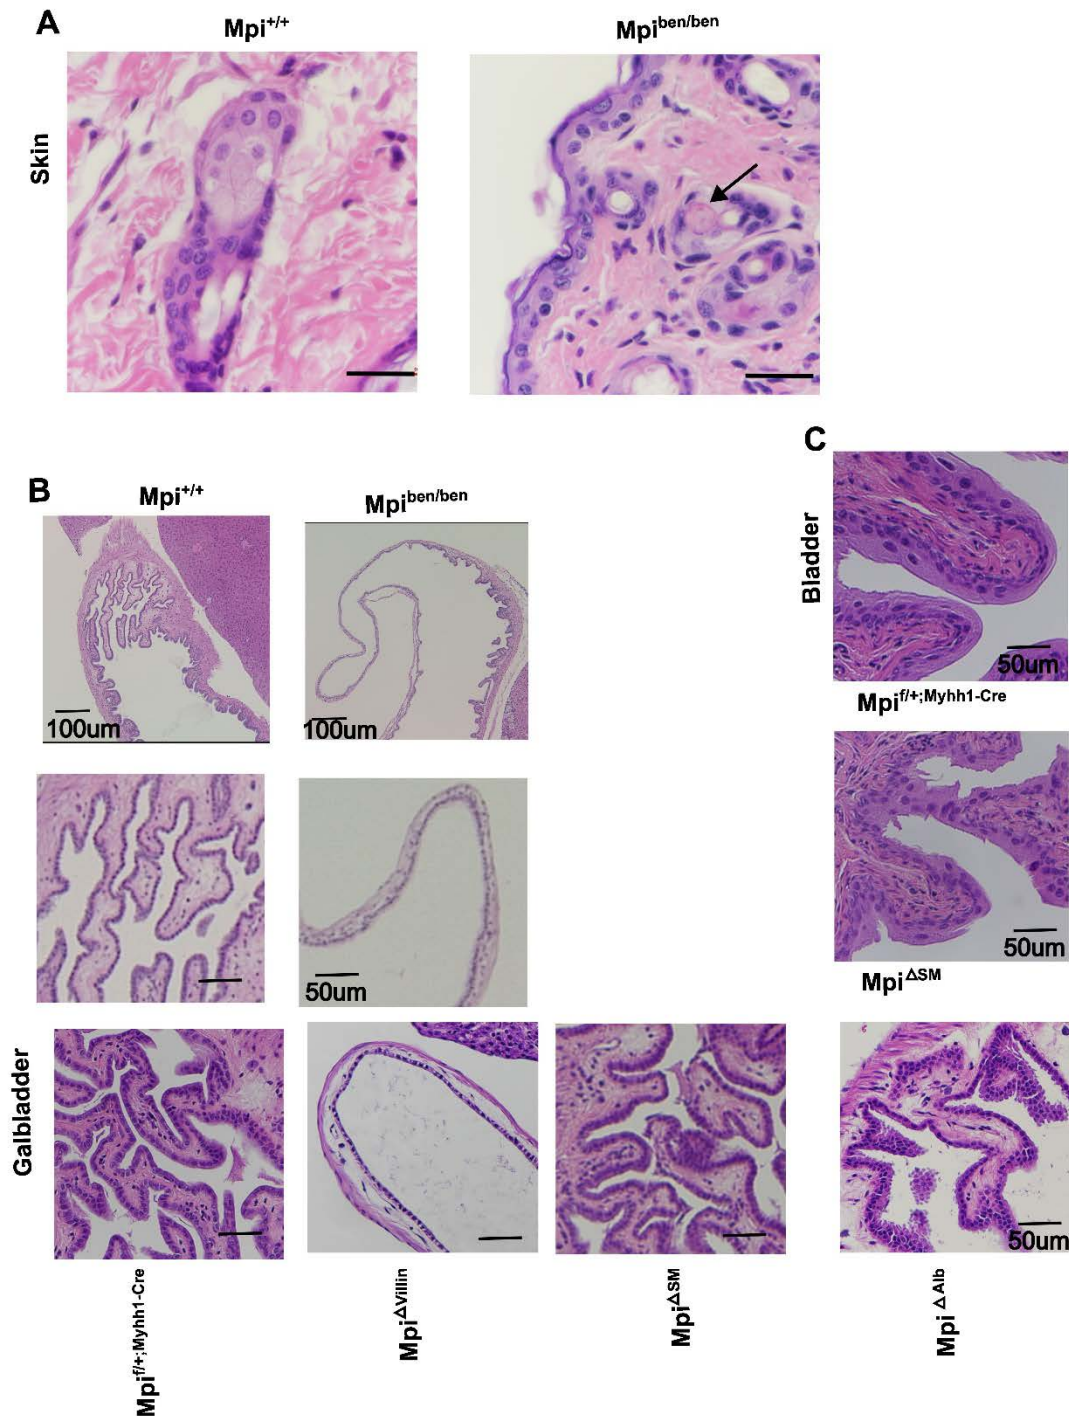

Supplemental Figure 2. **Histopathology of bladder and gallbladder.** (A) Representative microscopic images of hematoxylin and eosin (H&E)-stained sections of skin with focus on sebaceous glands and inclusions (arrow), and (B) gallbladders from *Mpi<sup>+/+</sup>*, *Myh11<sup>ERT2-Cre</sup>*, *Mpi<sup>f/f</sup>*, *Villin<sup>Cre</sup>* (*Mpi<sup>ΔVillin</sup>*), *Mpi<sup>f/f</sup>*; *Myh11<sup>ERT2-Cre</sup>* (*Mpi<sup>ΔSM</sup>*), *Mpi<sup>f/f</sup>*; *Alb<sup>Cre</sup>* (*Mpi<sup>ΔAlb</sup>*), *Mpi<sup>+/+</sup>*, and *Mpi<sup>ben/ben</sup>* mice. (B) Representative microscopic images of hematoxylin and eosin (H&E)-stained sections of bladders from *Mpi<sup>f/+</sup>*; *Myh11<sup>ERT2-Cre</sup>* and *Mpi<sup>f/f</sup>*; *Myh11<sup>ERT2-Cre</sup>* mice.

Figure S3

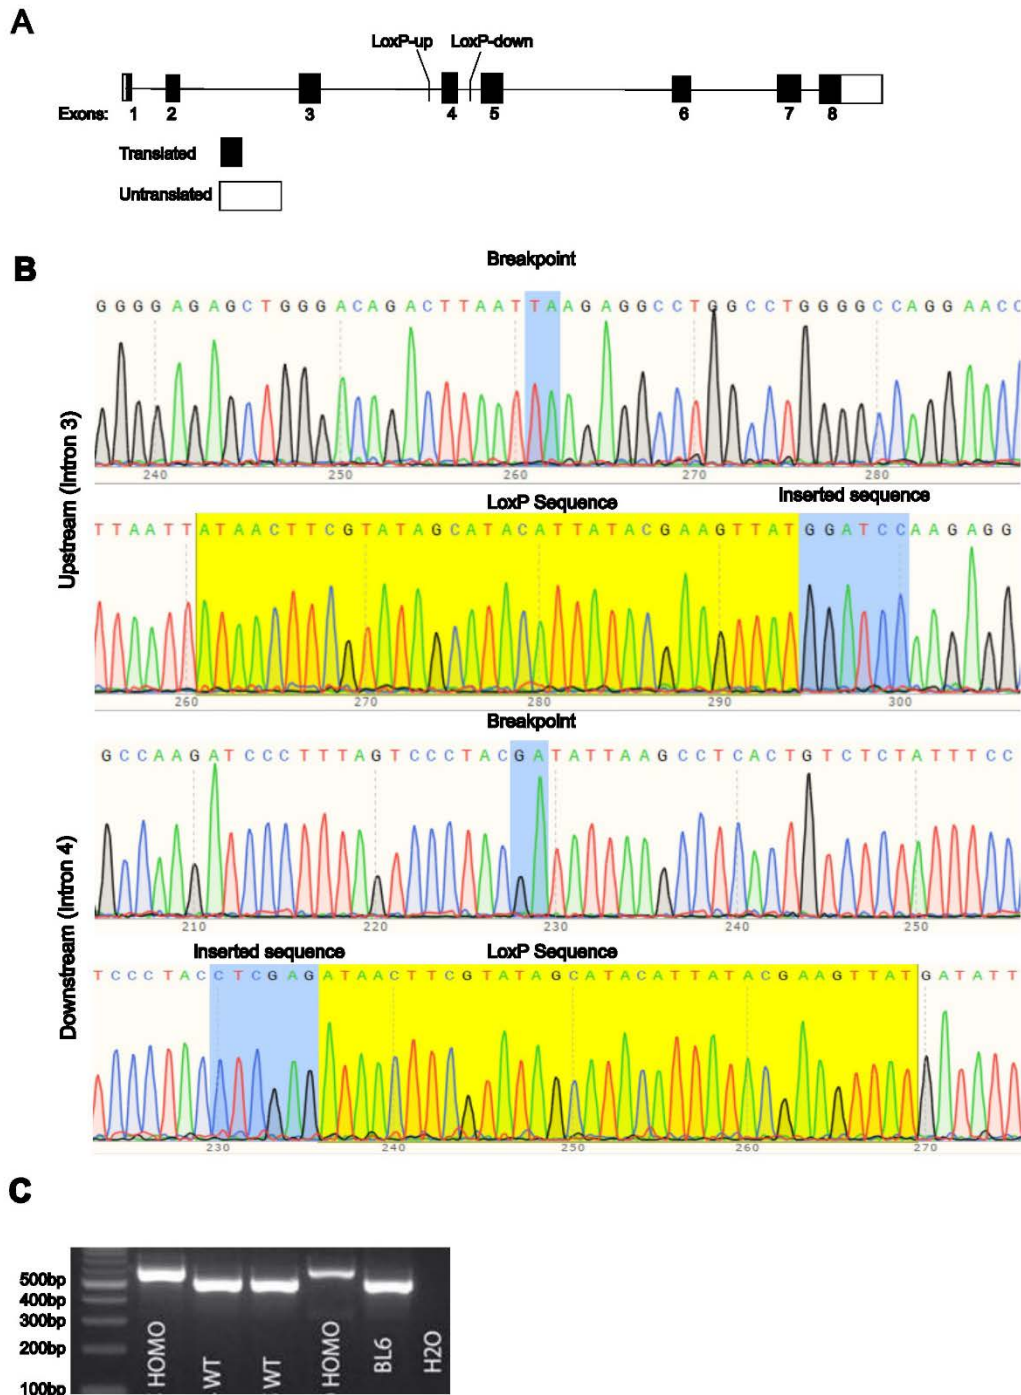

Supplemental Figure 3. **Diagram of *Mpi*<sup>fllox</sup> allele targeting and confirmation by sequencing and gel electrophoresis.** (A) Location of CRISPR gRNA targets for *Mpi*<sup>fllox</sup> alleles. (B) Capillary gel electrophoresis sequencing results demonstrating insertion of loxP sequences (highlighted in yellow) in the upstream (top) and downstream (bottom) locations. (C) Results of PCR and gel electrophoresis from primers flanking the two loxP sites. WT gene product is ~500 bp in length, while the *Mpi*<sup>fllox</sup> allele is 73 bp longer, at ~573 bp.

Figure S4

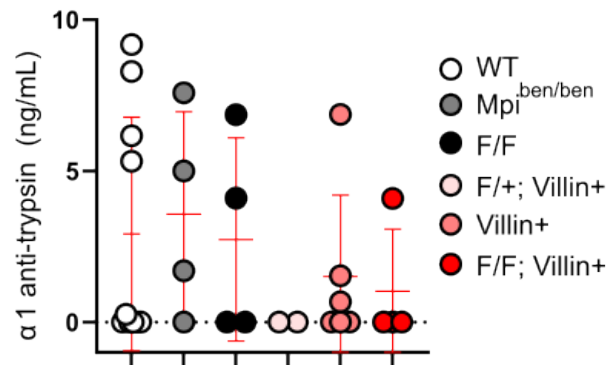

Supplemental Figure 4. **Assessing protein-losing enteropathy in stool.** Alpha-1 antitrypsin was measured in stool pellets collected from mice housed individually in cardboard boxes for 30-60 minutes. The stool was mixed with lysis buffer and was sonicated and centrifuged; the supernatant was used in an ELISA for *Mpr<sup>+/+</sup>*, *Mpr<sup>ben/ben</sup>*, *Mpr<sup>f/f</sup>*, *Mpr<sup>f/+</sup>*, *Villin<sup>Cre</sup>*, *Villin<sup>Cre</sup>*, and *Mpr<sup>f/f</sup>*; *Villin<sup>Cre</sup>* mice (n = 8, 4, 4, 2, 6, 4). Data points represent individual mice. Error bars indicate SD. Data represent values from two experiments combined. Most values were below the limit of detection.



Figure S5

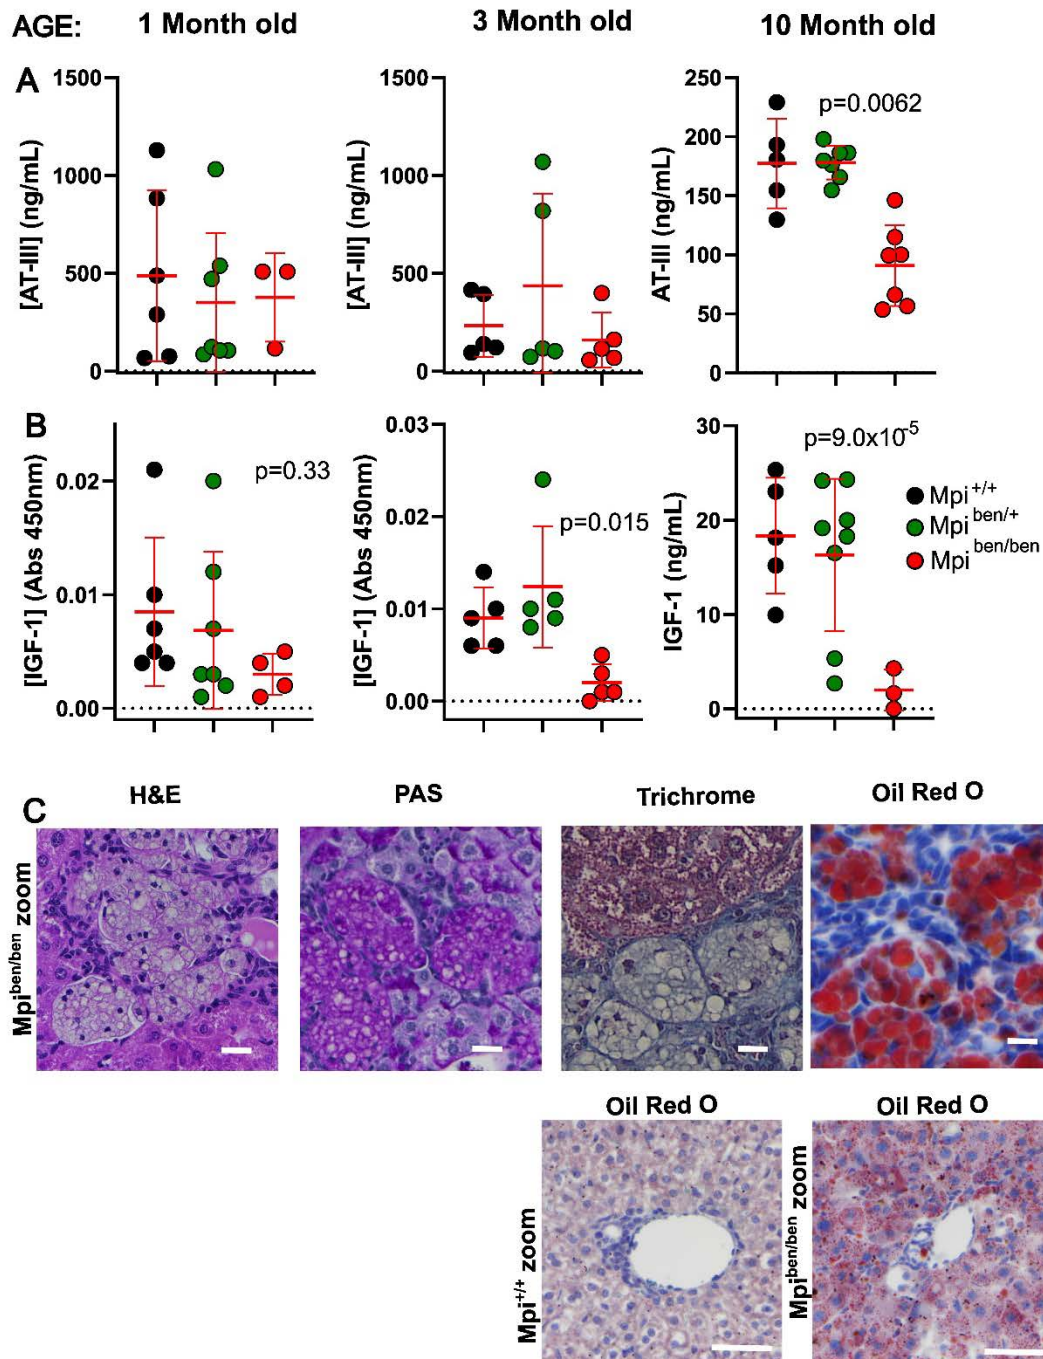

Supplemental Figure 5. **Antithrombin III and IGF-1 levels by age.** (A) Antithrombin III (AT III) in serum was measured by ELISA in *Mpi*<sup>+/+</sup>, *Mpi*<sup>ben/+</sup>, and *Mpi*<sup>ben/ben</sup> mice at one month ( $n = 6, 7, 3$ ) and three months of age ( $n = 5, 5, 5$ ), and ten months of age ( $n = 5, 7, 7$ ). (B) Insulin-like growth factor 1 (IGF-1) in serum was measured by ELISA in *Mpi*<sup>+/+</sup>, *Mpi*<sup>ben/+</sup>, and *Mpi*<sup>ben/ben</sup> mice at one month ( $n = 6, 7, 4$ ), three months of age ( $n = 5, 5, 5$ ), and ten months of age ( $n = 5, 8, 3$ ). Data points represent individual mice. Error bars indicate SD. *P*-values were determined by CRISPR *P*-value calculator for a recessive mode of inheritance. Lines in histology images

represent 25  $\mu\text{m}$ . **(C)** Zoomed in focus on the macrophage (top row) aggregates in the livers of  $\text{Mpi}^{\text{ben/ben}}$  mice stained with hematoxylin and eosin, periodic acid Schiff, trichrome, or Oil Red O. The bottom row focuses on wild type and  $\text{Mpi}^{\text{ben/ben}}$  hepatocytes stained by Oil Red O.

Supplemental Table 1. Tracking of Mendelian ratios of *Mpi benadryl* and KO allele breedings.

|                                           |                      |                            |      |
|-------------------------------------------|----------------------|----------------------------|------|
| Supplemental Table<br>1                   |                      |                            |      |
| Het x Het Breeding ( <i>benadryl</i> )    |                      |                            |      |
| <b>Genotype</b>                           | <b>Number weaned</b> | <b>Number<br/>expected</b> |      |
| WT                                        | 30                   | 30                         | 100% |
| Het Replacement                           | 61                   | 60                         | 102% |
| Homo Replacement                          | 18                   | 60                         | 60%  |
|                                           |                      |                            |      |
| Het-KO x Het Breeding ( <i>benadryl</i> ) |                      |                            |      |
| <b>Genotype</b>                           | <b>Number weaned</b> | <b>Number<br/>expected</b> |      |
| WT                                        | 17                   | 13                         | 131% |
| Het Replacement                           | 15                   | 13                         | 115% |
| Het KO                                    | 19                   | 13                         | 146% |
| Compound Het                              | 0                    | 12                         | 0%   |



Supplemental Table 2. CRISPR vectors used for targeting *Mpi* and creating *benadryl* replacement allele.

|                                |                                                                                                                                                                                                                  |
|--------------------------------|------------------------------------------------------------------------------------------------------------------------------------------------------------------------------------------------------------------|
| Supplemental Table 2           |                                                                                                                                                                                                                  |
| <i>benadryl</i> CRISPR system  | Alt-R® CRISPR-Cas9 crRNA, 2 nmol                                                                                                                                                                                 |
| crRNA_ <i>Mpi</i>              | TGGATGGGGACACACCCCCG                                                                                                                                                                                             |
| ssODN_ <i>benadryl</i>         | gatacatgcttcatacatccagggctgtcagttgcttccttttctcaacttcctgttcttc<br>cagctgtggatggggacaCGCccccggggagatgccaagatccttgacaacc<br>gtatttcccagaagaccttaggccagtggtgctgaaaacccggactgcttgggct<br>caaagggtcaaaaacacctttaatggaa |
|                                |                                                                                                                                                                                                                  |
| Flox CRISPR system             | Alt-R® CRISPR-Cas9 crRNA, 2 nmol                                                                                                                                                                                 |
| crRNA_LoxP_ <i>Mpi</i> _Up_T   | CTGGGACAGACTTAATTAAG                                                                                                                                                                                             |
| crRNA_LoxP_ <i>Mpi</i> _Down_T | CAGTGAGGCTTAATATCGTA                                                                                                                                                                                             |
| Product                        | 4 nmole Ultramer® DNA Oligo                                                                                                                                                                                      |
| ssODN_UpLoxP- <i>Mpi</i> _T    | atctaactctacctccccctaaatcatttaccctcatcacacagcttatgtgcctcctgtt<br>tagggttcctggccccaggccaggc <b>cctcttATAACTTCGTATAATGTA</b><br><b>TGCTATACGAAGTTATCTCGAGaattaagtctgtcccag</b> ctctccc<br>ctggcccatgttt            |
| ssODN_Down-LoxP- <i>Mpi</i> _T | cctcagcaaccacacctgagcctgggtctcacctctggccactggcccctaagac<br>tgctcatgaggccaagatccctttagtcctacCTCGAGATAACTTCGT<br>ATAGCATACATTATACGAAGTTATgatattaagcctcactgtctctattt<br>cccctctggccc                                |
