# Supplementary material for: A hypomorphic Mpi mutation unlocks an in vivo tool for studying global N-glycosylation deficiency
Source: JCI journal article supplement (doi:10.1172/jci.insight.180752), 2025-07-21

## Unedited Blots for: A hypomorphic *Mpi* mutation unlocks an in vivo tool for studying global *N*-glycosylation deficiency

Authors: Elisa B. Lin<sup>1</sup>, Steve Meregini<sup>1</sup>, Zhao Zhang<sup>2, 3</sup>, Avishek Roy<sup>1</sup>, Tandav Argula<sup>1</sup>, James Mitchell<sup>1</sup>, William J. Israelsen<sup>4</sup>, Sara Ludwig<sup>3</sup>, Jamie Russell<sup>3</sup>, Jiexia Quan<sup>3</sup>, Sara Hildebrand<sup>3</sup>, Evan Nair-Gill<sup>2</sup>, Bruce Beutler<sup>3</sup>, Jeffrey A. SoRelle<sup>1,3,5\*</sup>

### Affiliations:

Department of Pathology, University of Texas Southwestern Medical Center, Dallas, TX, USA

Division of Endocrinology, Department of Internal Medicine, University of Texas Southwestern Medical Center, Dallas, TX, USA

Center for Genetics of Host Defense, University of Texas Southwestern Medical Center, Dallas, TX, USA

Department of Biochemistry, University of Texas Southwestern Medical Center, Dallas, TX, USA

Division of Allergy/Immunology, Department of Pediatrics, University of Texas Southwestern Medical Center, Dallas, TX, USA

Figure 2B

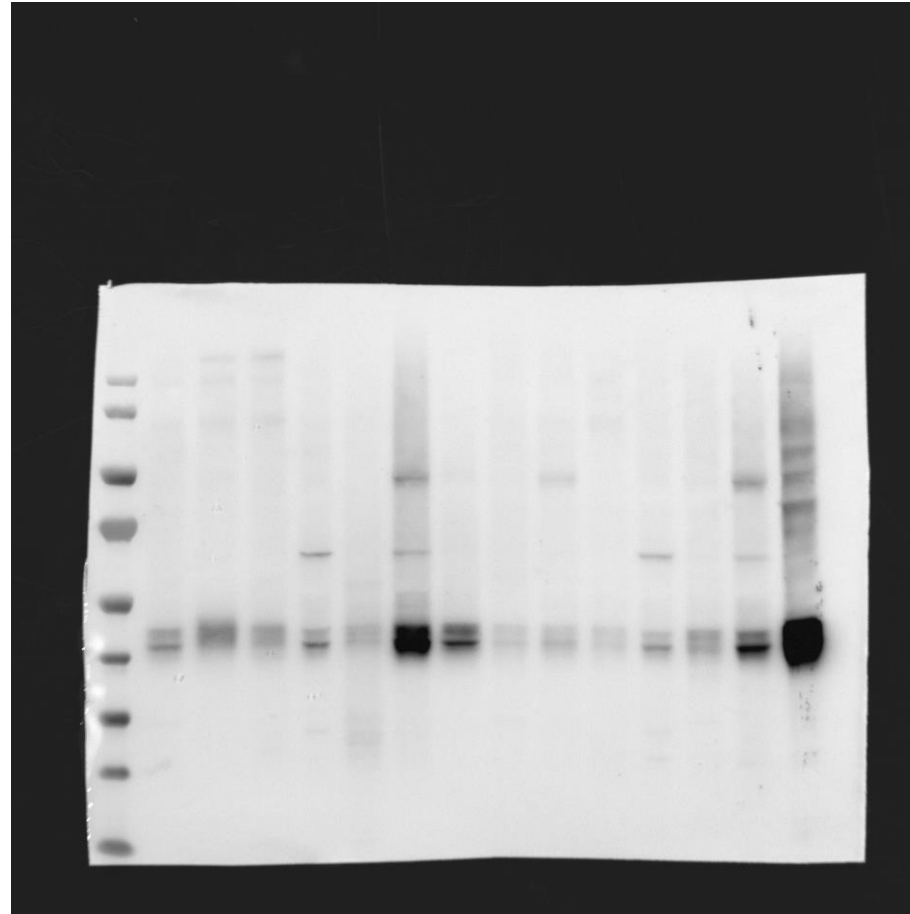

# Figure S1 (full unedited included in Supplement

Figure S1

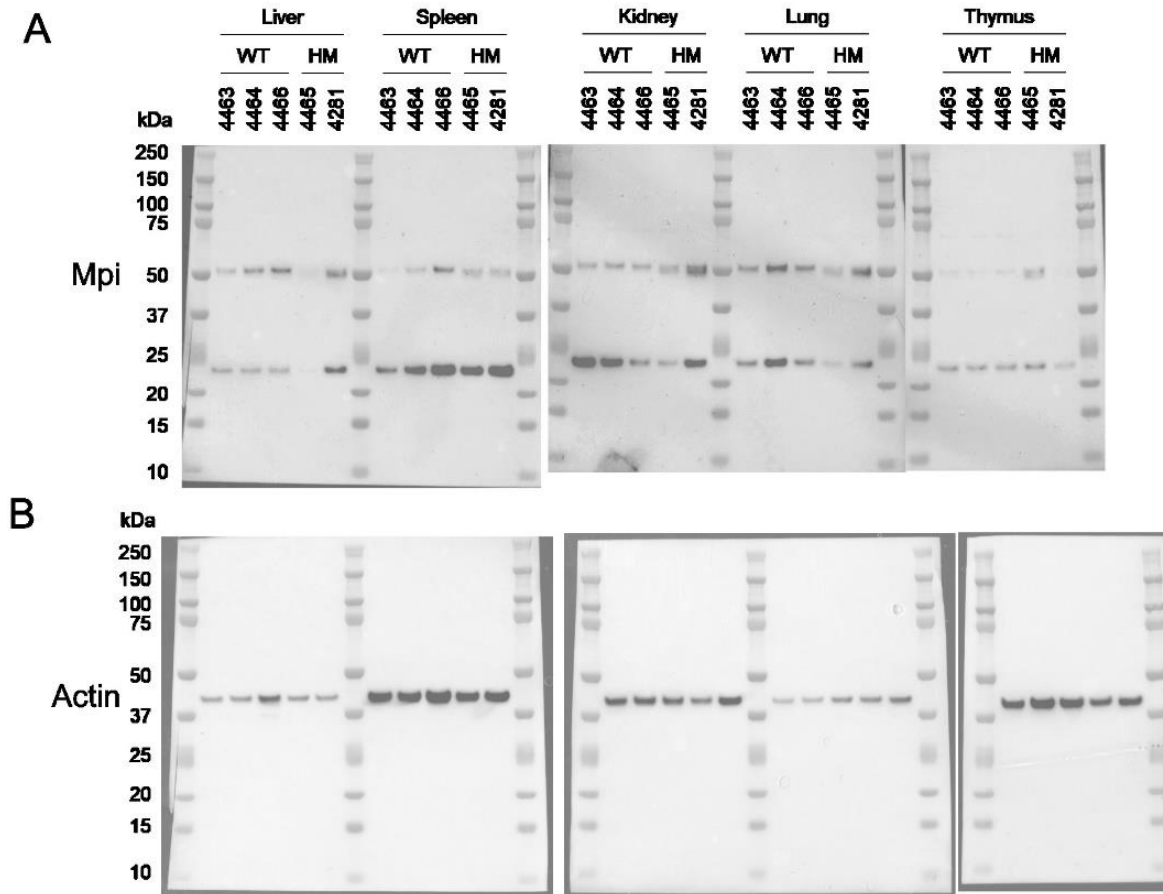

Supplement: sd2 [file 2]
